# Supplementary material for: The crystal structure of Zika virus helicase: basis for antiviral drug design
Source: PubMed Central journal article supplement (PMC4887331; doi:10.1007/s13238-016-0275-4), 2016-05-12
Supplement: 13238_2016_275_MOESM1_ESM.pdf [file 13238_2016_275_MOESM1_ESM.pdf]

## SUPPLEMENTAL MATERIALS

### Cloning and expression

The catalytic domain of the ZIKV helicase (residues 172 to 617) was amplified by PCR using the forward primer 5'-CGCGGATCCGAAGAGACACCGGTGGAGT-3' and the reverse primer 5'-CCGCTCGAGTTACCGTTTTCCGGCTGCGAA-3'. The underlined regions correspond to *Bam*HI and *Xho*I sites, respectively. The coding sequence for ZIKV helicase was cloned into the vector pET.32M.3C and fused at its N-terminus to thioredoxin and a (His)<sub>6</sub> tag followed by PreScission Protease (GE) cleavage site. Transformed *Escherichia coli* BL21 (DE3) clones were grown in LB medium at 37°C and then induced by 0.2 mM isopropyl-β-D-thiogalactopyranoside at 16°C. After overnight growth, cells were harvested via centrifugation.

### Protein purification and crystallization

Cells resuspended in lysis buffer A (20 mM Na<sub>2</sub>HPO<sub>4</sub>, pH 8.0, 0.5 M NaCl and 20 mM imidazole) were lysed by high pressure homogenization and the lysate was clarified by centrifugation at 30,000×g for 40 min at 4°C. The supernatant was purified by Ni Sepharose (GE) affinity chromatography equilibrated with buffer A. Proteins were eluted using buffer A supplemented with 250 mM imidazole. After concentration by ultrafiltration and dilution in buffer B (20 mM Na<sub>2</sub>HPO<sub>4</sub>, pH 8.0, 0.5 M NaCl), the fraction containing Trx-(His)<sub>6</sub>-ZIKV helicase was cleaved with PreScission Protease at 4°C for approximately 12 h. The cleavage mixture was loaded onto a HiTrap Q 5 mL column (GE) pre-equilibrated with buffer C (50 mM Tris-HCl,

pH 8.0, 50 mM NaCl) and eluted using a linear NaCl concentration gradient. Concentrated protein of interest was subjected to a final gel-filtration purification step through a HiLoad 16/600 Superdex 200<sup>TM</sup> PG column (GE) in buffer D (10 mM Tris-HCl, pH 8.0, 150 mM NaCl, 5mM dithiothreitol, and 5% glycerol). Crystals of native ZIKV helicase (stored in buffer D) were grown at 18°C by the microbatch-under-oil method and the crystallization condition consisted of 0.1 M Sodium citrate tribasic dihydrate pH 5.5, 22% (w/v) polyethylene glycol 1000. A volume of 1  $\mu$ L of precipitating solution was mixed with an equal volume of ZIKV helicase at a concentration of 5 mg mL<sup>-1</sup>.

#### **Crystal data collection, structure determination and refinement**

Crystals were cryoprotected using the crystallization buffer with 30% glycerol and flash-frozen in liquid nitrogen. Diffraction data were collected at 100 K at Shanghai Synchrotron Radiation Facility (SSRF) beamline BL18U1 with wavelength of 0.97791 Å. Diffraction data were processed using HKL3000 (Minor, 1997) in space group  $P2_1$ . The data statistics are summarized in Supplementary Table 1. The structure was solved by molecular replacement using the structure of DENV-2 helicase (PDB ID 2BHR) as a search model. The program PHASER (McCoy et al., 2007) was used for the molecular replacement search. The initial model was auto-built by Buccaneer (Cowtan, 2006) and refined through iterative rounds of TLS and restrained refinement using Refmac5 (Murshudov et al., 2011), followed by rebuilding manually using Coot (Emsley and Cowtan, 2004). Final refinement was finished by PHENIX (Afonine et al., 2012). The final model has an  $R_{\text{work}}/R_{\text{free}}$  of

18.0%/20.0%. The refinement statistics are summarized in Supplementary Table 1. The refined coordinates have been deposited in the PDB under accession number 5JMT.

### **Structural analysis and illustrations**

Pairwise superposition of a series of helicase structures was performed using the program SHP (Stuart et al., 1979). A full matrix of evolutionary distances was calculated and the tree representation was generated using the program PHYLIP (Felsenstein, 1997).

ZIKV  
 ZIKV 172 .EETP..VECFEPLSLKRRQLTVLDLHPGAGKTRRVLEIVREAIKTRLRRTVLELAPFRVV  
 DENV-4 172 .GEP..DYEVDEITFRKKRLTIMDLHPGAGKTRRILPQIVREALLRRLRLLIAPFRVV  
 MVEV 172 .EFPV..PEAYNPEMLKRRQLTVLDLHPGAGKTRRILPQIKDAIQKRLRTAYLAPFRVV  
 DENV-2 171 .SIED..NPEIEDDIFRKKRLTIMDLHPGAGKTRRILPQIVREAIKRRGLRLLIAPFRVV  
 JEV 171 QEEFPV..PEAYTNMLRKRQMTVLDLHPGSGKTRRILPQIKDAIQORLRTAYLAPFRVV  
 KUNV 171 MDEPVP..PAGFEPMLRKKQITVLDLHPGAGKTRRILPQIKDAINRRLRTAYLAPFRVV  
 YFV 171 .EGKE..ELQEIPTMLKRRQMTVLDLHPGAGKTRRILPQILAECAARRLRLLIAPFRVV  
 HCV 180 .RSPVFTDNSSPFAVPSQSFQVAHLHAPTIGSGKSTRVPAAYAA...AQGYKVLVLPVYAA

ZIKV  
 ZIKV 229 AA...EME...EALRGLPVRVY...TAVNVVTHSGTEIVDLMCHATFTSRL  
 DENV-4 228 AA...EME...EALRGLPVRVY...TAVKSDHTGRREIVDLMCHATFTTTL  
 MVEV 229 AA...EMA...EALRGLPVRVY...TAVQREHSGNEIVDVMCHATLTHRL  
 DENV-2 228 AA...EME...EALRGLPVRVY...TAVRAETHGRREIVDLMCHATFTMRL  
 JEV 229 AA...EMA...EALRGLPVRVY...TAVQREHSGNEIVDVMCHATLTHRL  
 KUNV 229 AA...EMA...EALRGLPVRVY...TAVAREHNGNEIVDVMCHATLTHRL  
 YFV 228 LS...EMK...EAFHGLDVKFT...TQAFSAHSGREIVDAMCHATLTYRM  
 HCV 235 TLGFGAYMSKAHGVDPNIRTVGRTITIGSPITYS...L...YGRKFLADGGC...L...

ZIKV  
 ZIKV 271 LQPIRVPNYNYLIMDEAHEFTDPSIAAARGYIISTRVEM.GEAAAIFMTATPPGIRDAF.PD  
 DENV-4 270 LSSTRVPNYNYLIVMDEAHEFTDPSVAARGYIISTRVEM.GEAAAIFMTATPPGSDPP.PQ  
 MVEV 271 MSPLRVPNYNYLIVMDEAHEFTDPSIAAARGYIATRVEA.GEAAAIFMTATPPGSDPP.PD  
 DENV-2 270 LSPTRVPNYNYLIIIMDEAHEFTDPSIAAARGYIISTRVEM.GEAAIFMTATPPGSDPP.PQ  
 JEV 271 MSPNRVPNYNYLIVMDEAHEFTDPSIAAARGYIATRVEL.GEAAAIFMTATPPGITDPF.PD  
 KUNV 271 MSPTRVPNYNYLIVMDEAHEFTDPSIAAARGYIISTRVEL.GEAAAIFMTATPPGSDPP.PE  
 YFV 270 LBPTRVNVWEVLIIMDEAHEFTDPSIAAARGWAAHRARA.NESATILMTATPPGSDPP.PH  
 HCV 280 ...SGGAYDIILCECHSDAT...SILGIGTIVLDQAETA...GARLVVLAATATPPGSDPP.SHN

ZIKV  
 ZIKV 329 SNSPIMDTEVEVPERAWSSGFDFWVTDHSGKTVVSVVRNGNEIAACLITKAGKRVIIQLSR  
 DENV-4 328 SNSPIEDIEREIPERSWNTGFDWITDYOGKTVVSVVSKAGNDIANCLRKSGKRVIIQLSR  
 MVEV 329 TNSPVHDDVSEIPDRAWSSGFDFWITDYAGKTVVSVVSKMNEIAACLORAGKRVIIQLNR  
 DENV-2 328 SNAPIHDEEREIPERSWNSGHEWVTDKGGKTVVSVVSKAGNDIAACLKKNKRVIIQLSR  
 JEV 329 SNAPIHDLQDEIPDRAWSSGFDFWITDYAGKTVVSVVSKMNEIAMCLOKAGKRVIIQLNR  
 KUNV 329 SNAPIHDLQTEIPDRAWSSGFDFWITDYAGKTVVSVVSKMNEIAMCLOKAGKRVIIQLNR  
 YFV 328 SNGEIEDVQTDIPSEPPWNTGHDWILADKRPATWHLPSIRANVMMAASLRKAGKSVVVQLNR  
 HCV 336 IEEVALSITTTGIEIPFYG...KALIPLEVIKGRHLIICHSKKCKDELAAKLVALGINAVAYYR

ZIKV  
 ZIKV 389 KTFETEFQKTKHQEWFDFVVTDTISEMGNFKAADRVIDSRRCLKPVILTD...GGRVITLAGP  
 DENV-4 388 KTFDTEYPKTKLTDWDFVVTDTISEMGNFRAGRVIDFRRCLKPVILTD...GPERVILAGP  
 MVEV 389 KSYDTEYPKCKNGDWFVVTDTISEMGNFGASRVIDCRKSVKPIILDE...GEGRVILSVP  
 DENV-2 388 KTFDSEYIKTRTNDWDFVVTDTISEMGNFKAEFVIDFRRCKMKPVILTD...GERRVILAGP  
 JEV 389 KSYDTEYPKCKNGDWFVVTDTISEMGNFGASRVIDCRKSVKPIILE...GEGRVILGNP  
 KUNV 389 KSYETEYPKCKNDWDFVVTDTISEMGNFKASRVIDSRRKSVKPIIITE...GEGRVILGEP  
 YFV 388 KTFEREYPTIKQKPKDFLADTIAEMGNLCVERVLDQRTAFKPVLVDE...GRKVAIKGP  
 HCV 394 GLDVS...L...TINGDVVVSTDALMTGFTGDFSDVIDCNTVTVQVDFSLDPTFTIETTT

ZIKV  
 ZIKV 446 MPVTHSAAORRGRIGRNPKNKPGDEYLYGGGCA...ETEDH...AHVLEARMLLDN  
 DENV-4 447 IPVTPASAAORRGRIGRNPQEDDQYVFSGDPL...KNDEDH...AHWTEAKMLLDN  
 MVEV 448 SAITSASAAORRGRVGRNPSQIGDEYHYGGGTS...EDDTML...AHWTEAKILLDN  
 DENV-2 447 MPVTHSAAORRGRVGRNPKNENDQYIYMGEPL...ENDEDC...AHWKEAKMLLDN  
 JEV 448 SPITISASAAORRGRVGRNPNQVGDDEYHYGGGATS...EDDSNL...AHWTEAKIMLDN  
 KUNV 448 SAVTASAAORRGRITGRNPSQAGDEYCYGGGHTN...EDDSNC...AHWTEAKIMLDN  
 YFV 446 LRISASAAORRGRIGRNPNRDGDYIYSEPTS...ENNAHH...VCVLEASMLLDN  
 HCV 451 LPQDAVSRTOORRGRITGRKPGIYRFVARERPSGMFSSVSLCCEYDAGCAWVLELMPAETT

ZIKV  
 ZIKV 497 IYLDQGLIASLYRPEADKVAATEGFKLRITBQRKTFVELM...RRGDI PVWLAYQVVASAGI  
 DENV-4 498 IYTPPEGIIPTLFGPEREKQTQAIIDGFRLRGEORKTFVELM...RRGDI PVWLSYKVASAGI  
 MVEV 499 IHLPLNGLVAQLYGPEREKVTYTMDCGYRLRGEERKTFLELI...RTADI PVWLAYKVASNGI  
 DENV-2 498 INTPPEGIIPSMFPEREREKVDATIDGYRLRGEARKTFVDLM...RRGDI PVWLAYRVAAEGI  
 JEV 499 IHMPNGLVAQLYGPEREKAFYTMDCGYRLRGEERKTFLELL...RTADI PVWLAYKVASNGI  
 KUNV 499 INMPNGLIAQFYGPEREKVTYTMDCGYRLRGEERKTFLELL...RTADI PVWLAYKVAAAGV  
 YFV 497 MEVVRGMVAPLYGVEGTTPVSPCEMRLRDDQRKVEREL...RNCDI PVWLSWVAKAGL  
 HCV 511 VRLRAYMNTPEGLPVCQDHLFEFWEVFTGLTHIDAHLSQTKQSGENFPYLVAYQATVCAR

ZIKV  
 ZIKV 555 ...TYTDRRWCF...DGTINNTIMEDSVFPA.EVWTRHGEKRVLKRPRWMDARVC  
 DENV-4 556 ...SYKDRWCF...TGERNNQILEENMEV.EIWTREGEKRVLKRPRWLDARVY  
 MVEV 557 ...QYNDKRWCF...DGPNSNIILEDNMEV.EIITRI GERKVLKRPRWLDARVY  
 DENV-2 556 ...NYADRRWCF...DGVKNQILEENMEV.EIWTREGEKRVLKRPRWLDARVY  
 JEV 557 ...QYTDKRWCF...DGPRTNAILEDNMEV.EIITRI GERKVLKRPRWLDARVY  
 KUNV 557 ...SYHDRWCF...DGPRTNTILEDNMEV.EIITRI GERKVLKRPRWLDARVY  
 YFV 555 ...KTNDKRWCF...EGPEEHEILNDSGETVRCRAGGAKKVLKRPRWCDERVS  
 HCV 571 AQAPPESWDQMRKCLIRLKP TLHGFTPLLYRLGAVQN.EVWTRH...HP...ITTKYIMTCMS

ZIKV  
 ZIKV 601 SDHALKSFKEFAAGKR  
 DENV-4 602 ADPMALKDFKEFASGRK  
 MVEV 603 SDHQSLKWFKDFAA GKR  
 DENV-2 602 SDPLALKFKEFAAGKR  
 JEV 603 ADHQALKWFKDFAA GKR  
 KUNV 603 SDHQALKSFKDFASGRK  
 YFV 602 SDQSALSEFIKFAEGRR  
 HCV 626 ALEVV...L...L...

**Supplementary Figure S1. Structural alignment of *Flaviviridae* helicases by ESPript (Robert and Gouet, 2014).**

The sequences of ZIKV (accession no. KU312312), DENV-4 (accession no. AY618990), MVEV (accession no. AF161266), DENV-2 (accession no. AY037116), JEV (accession no. M55506), KUNV (accession no. AY274504), YFV (accession no. AF052437) and HCV (accession no. AF009606), were obtained from GenBank. Secondary structure elements of ZIKV helicase are displayed above the sequence alignment. The conserved motifs among superfamily 2 helicases are indicated.

## Supplementary Table S1. Data collection, phasing and refinement statistics

| ZIKV helicase                                           |                                    |
|---------------------------------------------------------|------------------------------------|
| <b>Data Collection</b>                                  |                                    |
| X-ray Source                                            | SSRF beamline BL18U1               |
| Wavelength (Å)                                          | 0.97791 Å                          |
| Space group                                             | $P2_1$                             |
| Unit cell a, b, c, $\alpha$ , $\beta$ , $\gamma$ (Å, °) | 53.4, 69.0, 57.9, 90.0, 94.4, 90.0 |
| Resolution range* (Å)                                   | 50.0-1.80 (1.83-1.80)              |
| Unique reflections                                      | 37570 (1351)                       |
| Completeness (%)                                        | 96.2 (69.5)                        |
| Redundancy                                              | 6.2 (3.3)                          |
| $I/\sigma I$                                            | 22.7 (3.0)                         |
| $R_{\text{merge}}$                                      | 0.083 (0.365)                      |
| <b>Refinement</b>                                       |                                    |
| Resolution range (Å)                                    | 44.3-1.80                          |
| No. of reflections (working/test)                       | 35650/1877                         |
| $R_{\text{work}}/R_{\text{free}}$                       | 0.180/0.200                        |
| Number of atoms                                         |                                    |
| Protein                                                 | 3516                               |
| Water                                                   | 439                                |
| B-factors                                               |                                    |
| Protein                                                 | 27.1                               |
| Water                                                   | 35.7                               |
| r.m.s. deviations                                       |                                    |
| Bond lengths (Å)                                        | 0.003                              |
| Bond angles (°)                                         | 0.777                              |

\* Numbers in the brackets are for the highest resolution shell.

## SUPPLEMENTAL REFERENCES

- Afonine PV, Grosse-Kunstleve RW, Echols N, Headd JJ, Moriarty NW, Mustyakimov M, Terwilliger TC, Urzhumtsev A, Zwart PH, Adams PD (2012) Towards automated crystallographic structure refinement with phenix.refine. *Acta Crystallogr D Biol Crystallogr* 68:352-367
- Cowtan K (2006) The Buccaneer software for automated model building. 1. Tracing protein chains. *Acta Crystallogr D Biol Crystallogr* 62:1002-1011
- Emsley P, Cowtan K (2004) Coot: model-building tools for molecular graphics. *Acta Crystallogr D Biol Crystallogr* 60:2126-2132
- Felsenstein J (1997) An alternating least squares approach to inferring phylogenies from pairwise distances. *Syst Biol* 46:101-111
- McCoy AJ, Grosse-Kunstleve RW, Adams PD, Winn MD, Storoni LC, Read RJ (2007) Phaser

- crystallographic software. *J Appl Crystallogr* 40:658-674
- Minor W, Otwinowski Z (1997) Processing of X-Ray Diffraction Data Collected in Oscillation Mode. *Methods in Enzymology* 276: Macromolecular Crystallography, part A, 307-326
- Murshudov GN, Skubak P, Lebedev AA, Pannu NS, Steiner RA, Nicholls RA, Winn MD, Long F, Vagin AA (2011) REFMAC5 for the refinement of macromolecular crystal structures. *Acta Crystallogr D Biol Crystallogr* 67:355-367
- Robert X, Gouet P (2014) Deciphering key features in protein structures with the new ENDscript server. *Nucleic Acids Res* 42:320-324
- Stuart DI, Levine M, Muirhead H, Stammers DK (1979) Crystal structure of cat muscle pyruvate kinase at a resolution of 2.6 Å. *J Mol Biol* 134:109-142
